# Supplementary material for: Low Serum 25-hydroxyvitamin D Level Does Not Adversely Affect Bone Turnover in Prepubertal Children
Source: MDPI journal article supplement (doi:10.3390/nu13103324), 2021-09-23
Supplement: s1 [file s1]

## Supplementary Material

Table S1. Characteristics of study participants after partition in tertiles according to IGF-1 concentrations.

| Characteristics          | IGF-1 tertiles (ng/mL) |                    |                   | <i>P</i> |
|--------------------------|------------------------|--------------------|-------------------|----------|
|                          | 1.                     | 2.                 | 3.                |          |
|                          | ≤ 169.3<br>N=42        | 172–229<br>N=43    | 230–541<br>N=43   |          |
| Height, cm (SD)          | 141 (8)                | 144 (8)            | 145 (9)           | 0.043    |
| BMI, percentile (SD)     | 44 (31)                | 56 (32)            | 59 (30)           | 0.056    |
| 25(OH)D ng/mL (SD)       | 23.1 (4.0)             | 21.7 (4.3)         | 21.3 (4.4)        | 0.106    |
| CTX, ng/mL, Me (Q1, Q3)  | 1.50 (1.06, 1.83)      | 1.50 (1.17, 2.26)  | 1.50 (1.05, 1.92) | 0.126    |
| P1NP, ng/mL, Me (Q1, Q3) | 1225 (1116, 1358)      | 1357 (1240, 1511)  | 1497 (1303, 3012) | <0.001   |
| BT index, Me (Q1, Q3)    | 0.08 (−0.53, 0.59)     | 0.15 (−0.76, 0.56) | 0.52(−0.10, 1.71) | 0.045    |

Abbreviations: N: number; IGF-1: insulin-like growth factor 1; SD : standard deviation; Me (Q1, Q3) : median (Quartile 1, quartile3); BMI: body mass index; 25(OH)D :25-hydroxyvitamin D; CTX : C-terminal telopeptide of type I collagen; P1NP: N-terminal propeptide of type I procollagen; BTindex: bone turnover index; p:statistical significance
